# Supplementary material for: Predictive Validity of a New Instrumental Activities of Daily Living Scale for Detecting the Incidence of Functional Disability among Community-Dwelling Older Japanese Adults: A Prospective Cohort Study
Source: PubMed Central journal article supplement (PMC7177260; doi:10.3390/ijerph17072291), 2020-03-29
Supplement: ijerph-17-02291-s001.pdf [file ijerph-17-02291-s001.pdf]

**Table S1.** Results of the sensitivity analysis examining the association between IADL measured by the NCGG-ADL scale and functional disability incidence ( $N = 2681$ ).

|                                           | Crude Model |           |          | Adjusted Model |           |          |
|-------------------------------------------|-------------|-----------|----------|----------------|-----------|----------|
|                                           | HR          | 95% CI    | <i>P</i> | HR             | 95% CI    | <i>P</i> |
| NCGG-ADL scale:                           |             |           |          |                |           |          |
| 13 points                                 |             | Reference |          |                | Reference |          |
| ≤ 12 points                               | 1.63        | 1.22–2.18 | 0.001    | 1.41           | 1.04–1.92 | 0.026    |
| Age (years)                               |             |           |          | 1.13           | 1.09–1.16 | <0.001   |
| Female (yes)                              |             |           |          | 1.40           | 1.06–1.84 | 0.016    |
| Body mass index (kg/m <sup>2</sup> )      |             |           |          | 0.97           | 0.93–1.01 | 0.130    |
| Education (years)                         |             |           |          | 1.01           | 0.96–1.06 | 0.657    |
| Hypertension (yes)                        |             |           |          | 1.08           | 0.84–1.40 | 0.559    |
| Diabetes mellitus (yes)                   |             |           |          | 1.24           | 0.88–1.74 | 0.222    |
| Heart disease (yes)                       |             |           |          | 1.27           | 0.96–1.69 | 0.098    |
| Parkinson’s disease (yes)                 |             |           |          | 1.90           | 0.47–7.70 | 0.370    |
| Stroke (yes)                              |             |           |          | 1.19           | 0.77–1.83 | 0.440    |
| Depression (yes)                          |             |           |          | 0.95           | 0.51–1.79 | 0.877    |
| Living alone ( <i>n</i> , %)              |             |           |          | 0.87           | 0.64–1.20 | 0.396    |
| Fall history ( <i>n</i> , %)              |             |           |          | 1.30           | 0.99–1.71 | 0.060    |
| Mild cognitive impairment ( <i>n</i> , %) |             |           |          | 1.68           | 1.21–2.35 | 0.002    |

HR, hazard ratio; CI, confidence interval; IADL, instrumental activities of daily living; NCGG-ADL, the National Center for Geriatrics and Gerontology Activities of Daily Living scale.
